# Supplementary material for: Improved Media Formulations for Primary Cell Cultures Derived from a Colonial Urochordate
Source: MDPI journal article supplement (doi:10.3390/cells12131709), 2023-06-23
Supplement: s1 [file s1]

## Improved media formulations for primary cell cultures derived from a colonial urochordate

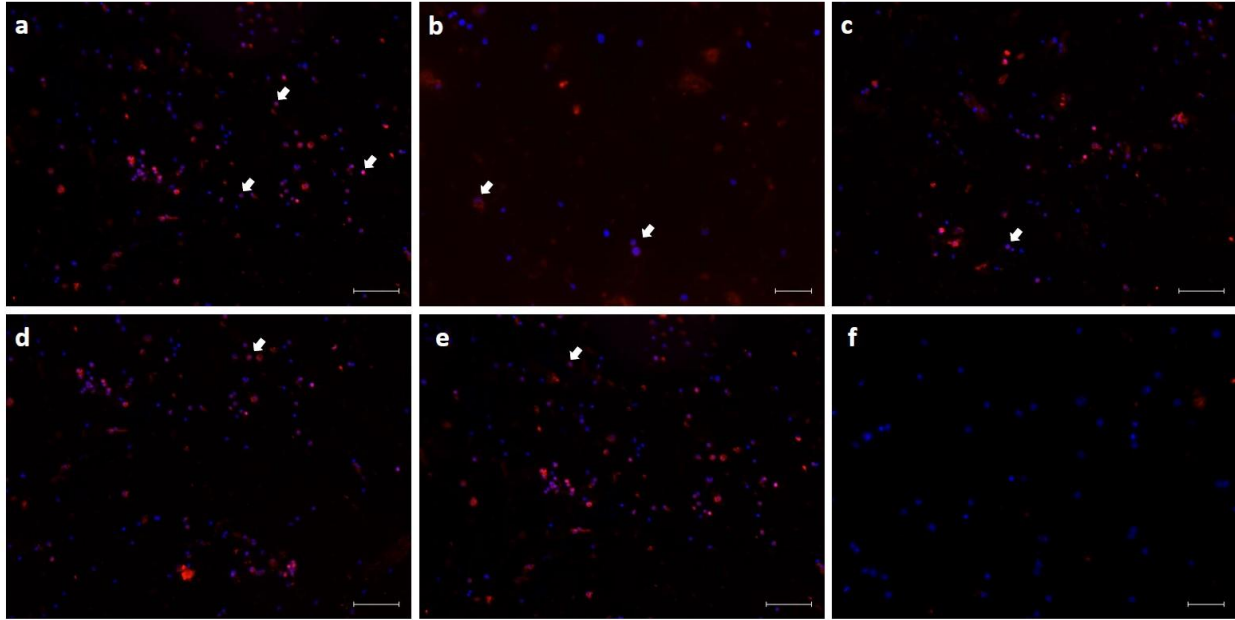

**Figure S1.** Immunofluorescence staining of *B. schlosseri* primary cultures under five media conditions at onset. a: TGM1. b: TGM2. c: TGM3. d: TGM4. e: TGM5. Blue dots are DAPI stained cell nuclei, red dots indicate PCNA<sup>+</sup> stained nuclei and pink cells (some marked with arrows) indicating PCNA<sup>+</sup> cells. f: negative control depict DAPI stained cell nuclei and unspecific staining of PCNA antibody. Scale bars: 20  $\mu$ m in b and f, 50  $\mu$ m in a, c, d and e.

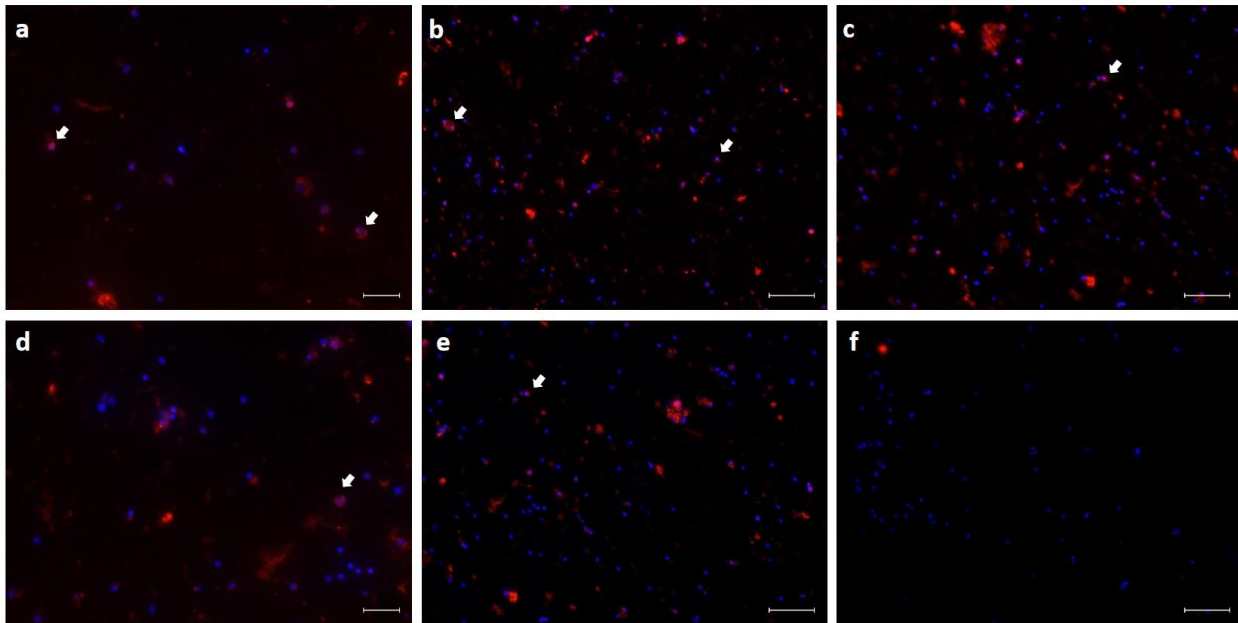

**Figure S2.** Immunofluorescence staining of *B. schlosseri* primary cultures under five media conditions at 24 h from initiation. a: TGM1. b: TGM2. c: TGM3. d: TGM4. e: TGM5. Blue dots are DAPI stained cell nuclei, red dots indicate PCNA<sup>+</sup> stained nuclei and pink cells (some marked with arrows) indicating PCNA<sup>+</sup> cells. f: negative control depict

DAPI stained cell nuclei and unspecific staining of PCNA antibody. Scale bars: 20  $\mu\text{m}$  in a and d, 50  $\mu\text{m}$  in b, c, e and f.

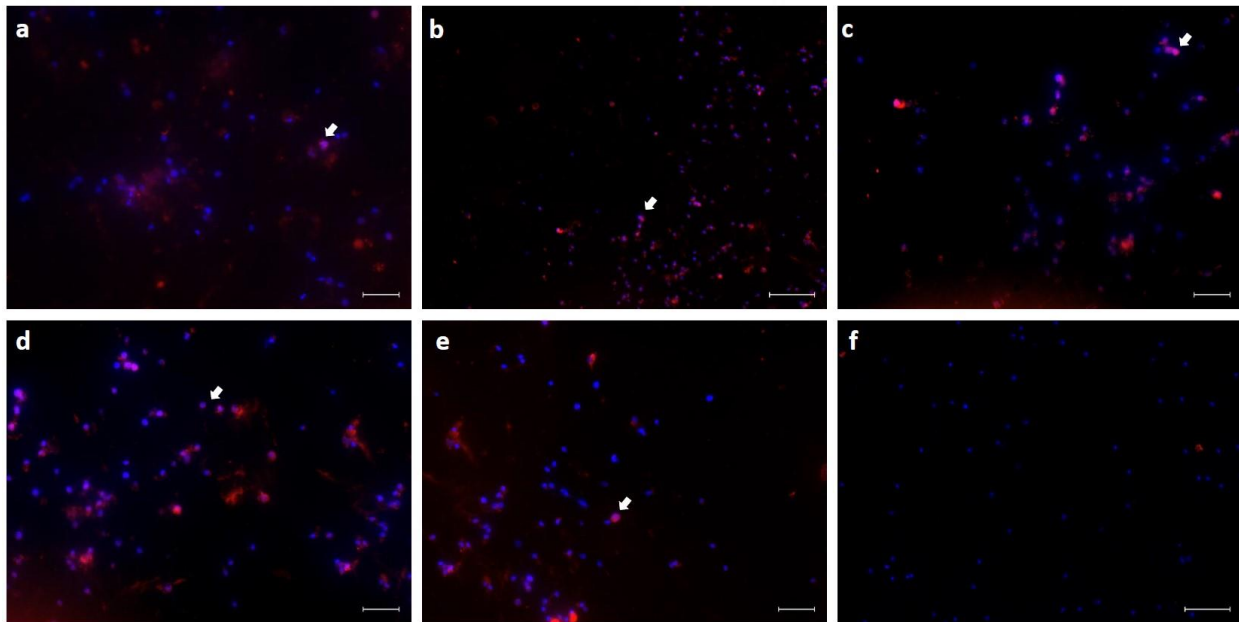

**Figure S3.** Immunofluorescence staining of *B. schlosseri* primary cultures under five media conditions at 3 days from initiation. a: TGM1. b: TGM2. c: TGM3. d: TGM4. e: TGM5. Blue dots are DAPI stained cell nuclei, red dots indicate PCNA<sup>+</sup> stained nuclei and pink cells (some marked with arrows) indicating PCNA<sup>+</sup> cells. f: negative control depict DAPI stained cell nuclei and unspecific staining of PCNA antibody. Scale bars: 20  $\mu\text{m}$  in a, c, d and e, 50  $\mu\text{m}$  in b and f.

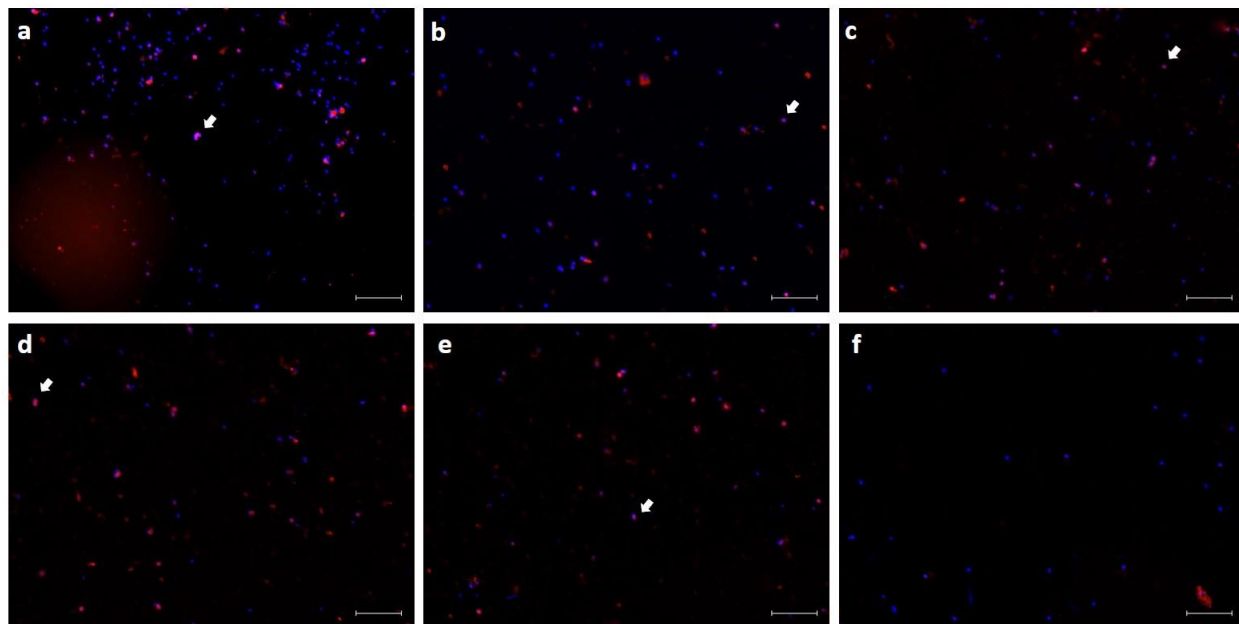

**Figure S4.** Immunofluorescence staining of *B. schlosseri* primary cultures under five media conditions at 8 days from initiation. a: TGM1. b: TGM2. c: TGM3. d: TGM4. e: TGM5. Blue dots are DAPI stained cell nuclei, red dots

indicate PCNA<sup>+</sup> stained nuclei and pink cells (some marked with arrows) indicating PCNA<sup>+</sup> cells. f: negative control depict DAPI stained cell nuclei and unspecific staining of PCNA antibody. Scale bars = 50  $\mu$ m.

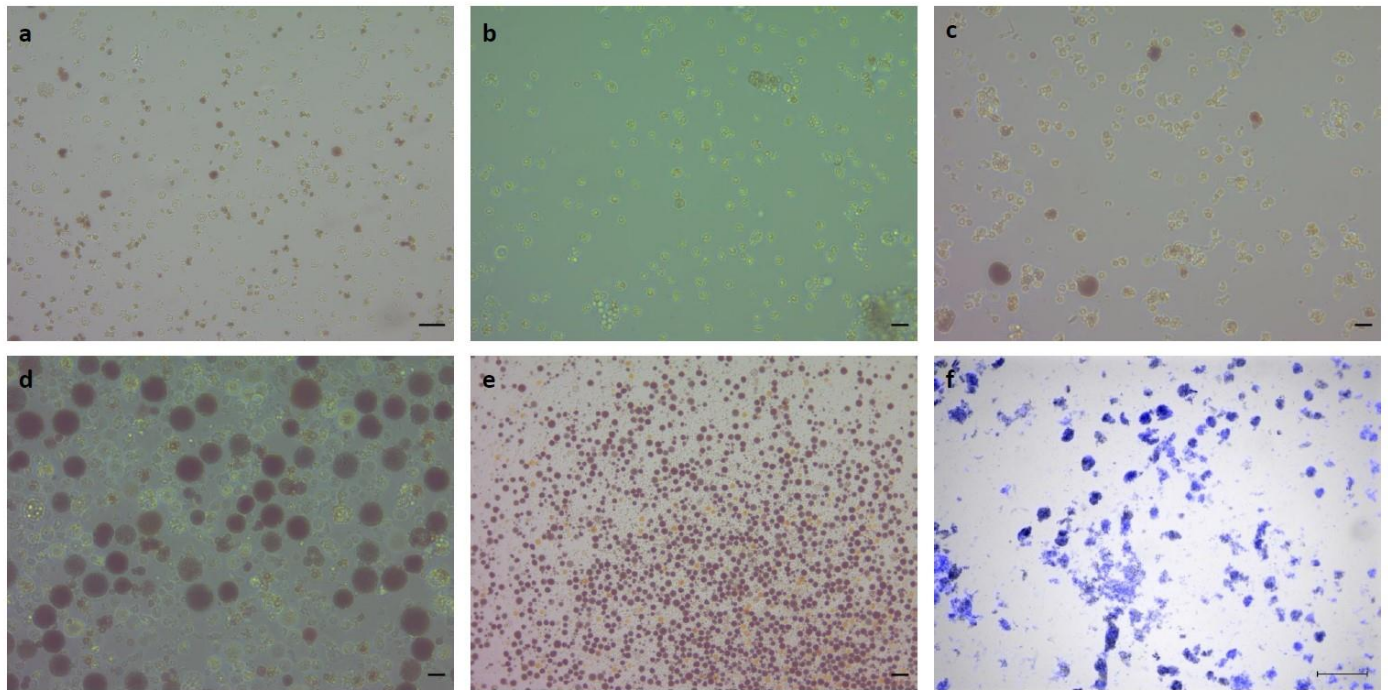

**Figure S5.** *B. schlosseri* primary blood cell cultures in medium TGM1: at onset (a), 24 h (b), days 3 (c), 8 (d) and 15 (e). f: fungi contamination at day 14 detected by calcofluor white staining. Scale bars: 10  $\mu$ m in b, c and d, 20  $\mu$ m in a, 80  $\mu$ m in e, 100  $\mu$ m in f.

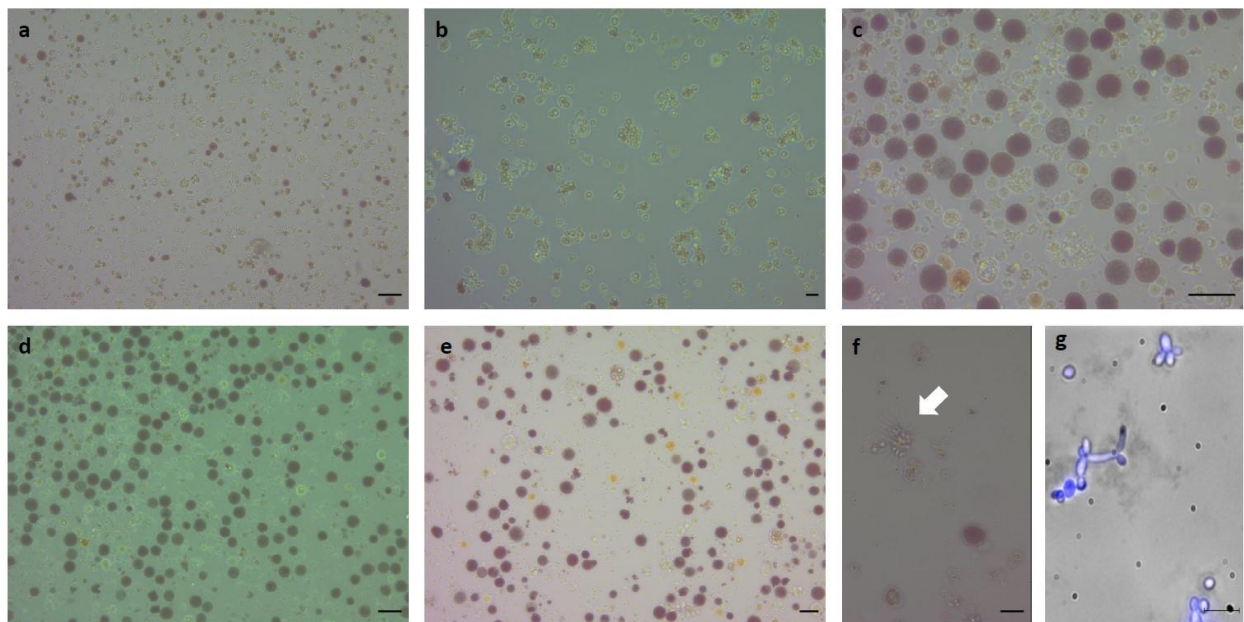



**Figure S6.** *B. schlosseri* primary blood cell cultures in medium TGM2: at onset (a), 24 h (b), days 3 (c), 8 (d) and 12 (e). Thraustochytrids contamination (arrow) at day 10 (f). g: yeast contamination at day 14 detected by calcofluor white staining. Scale bars: 10  $\mu\text{m}$  in b, f and g, 20  $\mu\text{m}$  in a and e, 40  $\mu\text{m}$  in c and d.

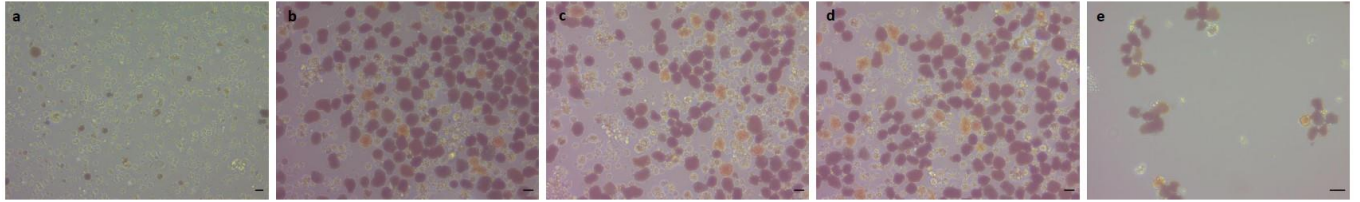

**Figure S7.** *B. schlosseri* primary blood cell cultures in medium TGM3: at onset (a), 24 h (b), days 3 (c), 8 (d) and 10 (e). Scale bars: 10  $\mu\text{m}$ .

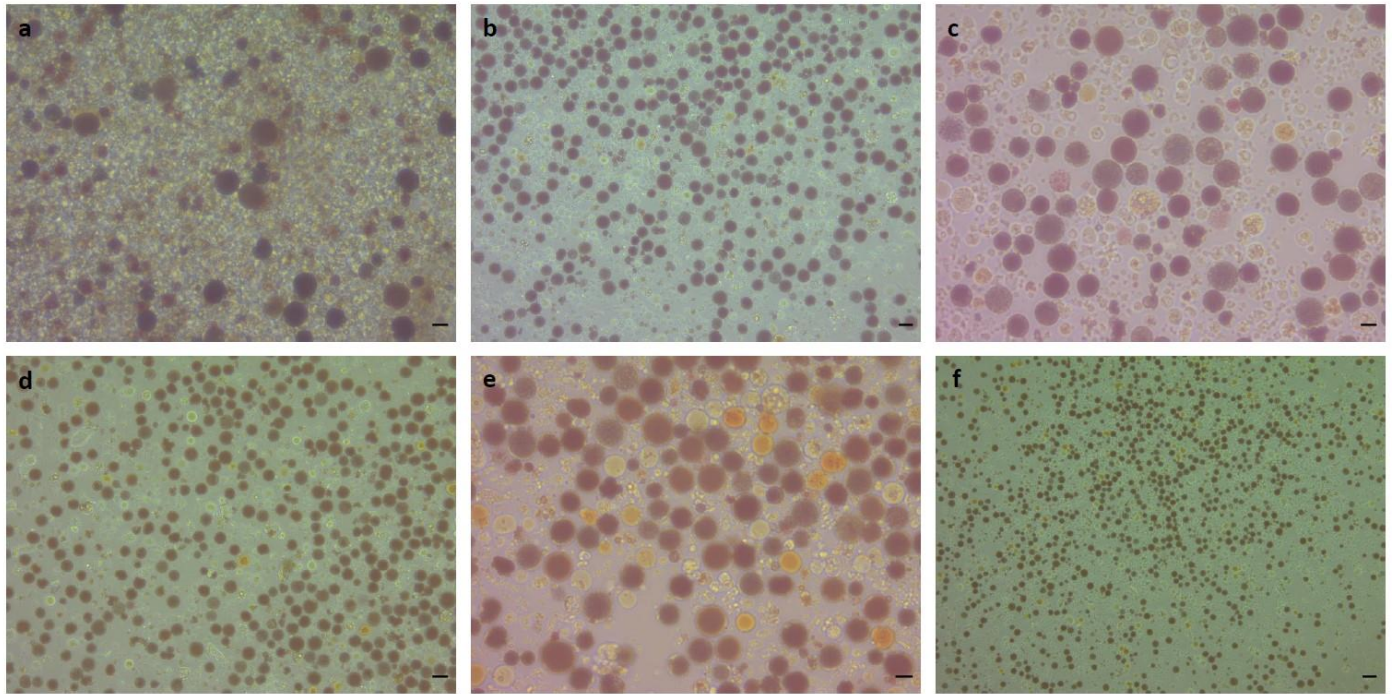

**Figure S8.** *B. schlosseri* primary blood cell cultures in medium TGM4: at onset (a), 24 h (b), days 3 (c), 8 (d), 17 (e) and 25 (f). Scale bars: 10  $\mu\text{m}$  in b-d, 20  $\mu\text{m}$  in a, e and f.

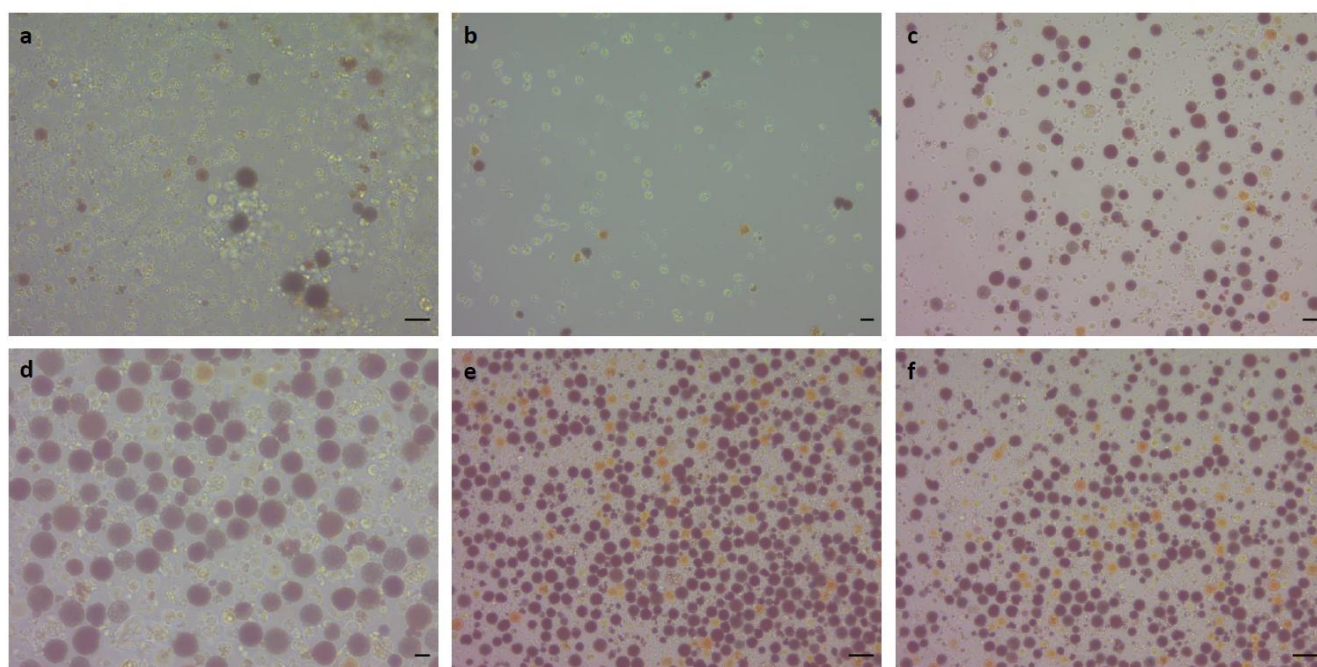

**Figure S9.** *B. schlosseri* primary blood cell cultures in medium TGM5: at onset (a), 24 h (b), days 3 (c), 8 (d), 17 (e) and 23 (f). Scale bars: 10  $\mu$ m in a-f, 20  $\mu$ m in f.

**Table S1.** Comparisons of media TGM1, TGM2, TGM3, TGM4 and TGM5 compositions. L-Glu - L-Glutamine, Hep - HEPES buffer, PSA - Penicillin Streptomycin Amphotericin b, Genta - Gentamicin, PS - Penicillin Streptomycin, SP - Sodium Pyruvate, FBS - Fetal Bovine Serum, DMEM - DMEM/F-12[HAM] 1:1 basal medium, RPMI - RPMI basal medium 1640, ASW - artificial sea water. +/- indicates the presence or absence of components in each medium.

| Medium/Component | L-Glu | Hep | PSA | Genta | PS | SP | FBS | DMEM | RPMI | ASW |
|------------------|-------|-----|-----|-------|----|----|-----|------|------|-----|
| TGM1             | +     | +   | -   | -     | +  | +  | +   | +    | -    | -   |
| TGM2             | +     | +   | -   | -     | +  | +  | +   | -    | +    | -   |
| TGM3             | +     | +   | +   | +     | -  | +  | +   | -    | -    | +   |
| TGM4             | +     | +   | -   | +     | +  | +  | +   | +    | -    | +   |
| TGM5             | +     | +   | -   | -     | +  | +  | +   | +    | -    | +   |
